# Supplementary material
Source: Springer Nature journal article supplement (https://www.springermedizin.de/resource/supplementary/12936_2012_2582_MOESM4_ESM.pdf/9543294)
Supplement: MOESM4 [file 9543294]

Additional file 4: The relative centrifugal force applied to the Accudenz gradient greatly affects sporozoite recovery.

*Plasmodium yoelii*

| <b>Relative Centrifugal Force</b> | <b>% Recovery</b> |
|-----------------------------------|-------------------|
| 1500 xg                           | 53.4              |
| 2000 xg                           | 62.8              |
| 2500 xg                           | 91.7              |
| 3000 xg                           | 12.0              |

*Plasmodium falciparum*

| <b>Relative Centrifugal Force</b> | <b>% Recovery</b> |
|-----------------------------------|-------------------|
| 1500 xg                           | 48.0              |
| 2000 xg                           | 61.0              |
| 2500 xg                           | 88.9              |
| 3000 xg                           | 8.5               |
